# Supplementary material
Source: MDPI journal article supplement (https://www.mdpi.com/2312-7481/9/2/55)
Supplement: s1 [file s1]

**A 3D Coordination Polymer based on *syn-anti* Bridged [Mn(RCOO)<sub>2</sub>]<sub>n</sub> Chains  
Showing Spin-Canting with High Coercivity and an Ordering Temperature of 14 K**

Soumen Kumar Dubey,<sup>1</sup> Maxcimilan Patra,<sup>1</sup> Kajal Gupta,<sup>1</sup> Subham Bhattacharjee,<sup>1\*</sup> Rajat Saha,<sup>1,2\*</sup> Carlos J Gómez García,<sup>2\*</sup>

*1- Department of Chemistry, Kazi Nazrul University, Asansol-713340, Paschim Bardhaman, West Bengal, India*

*2- Departamento de Química Inorgánica. Universidad de Valencia. Dr Moliner 50, 46100 Burjasot (Valencia) Spain*

**Table S1.** Structural data of all the reported structures with 6-hydroxypicolinic acid.

| CCDC     | M       | Form            | Structure | Ref       |
|----------|---------|-----------------|-----------|-----------|
| AYIVIO   | Cs(I)   | <i>Keto</i>     | 3D        | 1         |
| BEGXOC   | Ru(II)  | <i>Enol</i>     | Monom     | 2         |
| BOPXOU   | Cu(II)  | <i>Keto</i>     | Monom     | 3         |
| DICFEC   | Cu(II)  | <i>Keto</i>     | Monom     | 4         |
| EXOYIZ   | Mn(III) | L <sup>2-</sup> | Dimer     | 5         |
| FEFGIH   | Cu(II)  | <i>Enol</i>     | Monom     | 6         |
| JOZUC    | Cu(II)  | L <sup>2-</sup> | Dimer     | 7         |
| JOGBAL   | Cd(II)  | L <sup>2-</sup> | 1D        |           |
| MIWJIM   | Cu(II)  | L <sup>2-</sup> | 2D        | 8         |
| MIWJOS   | Cu(II)  | L <sup>2-</sup> | Dimer     |           |
| MIWJUY   | Cu(II)  | L <sup>2-</sup> | 2D        |           |
| MUTFIT   | Dy(III) | L <sup>2-</sup> | Trimer    | 9         |
| QEFRIE   | Ru(II)  | <i>Enol</i>     | Monom     | 10        |
| RIYDEJ   | Na(I)   | <i>Keto</i>     | 3D        | 11        |
| RUWCAO   | Ni(II)  | <i>Enol</i>     | Monom     | 12        |
| RUWCIW   | Ni(II)  | <i>Enol</i>     | Monom     |           |
| ULEYAL   | Re(II)  | L <sup>2-</sup> | Dimer     | 13        |
| ULEYEP   | Re(II)  | L <sup>2-</sup> | Dimer     |           |
| VAGXAF   | Re(III) | <i>Enol</i>     | Monom     | 14        |
| VAGXEJ   | Re(V)   | <i>Enol</i>     | Monom     |           |
| VAHZEM   | Re(IV)  | L <sup>2-</sup> | Dimer     |           |
| VAJPEE   | Re(IV)  | L <sup>2-</sup> | Dimer     |           |
| VUSNON   | Ru(II)  | <i>Enol</i>     | Monom     | 15        |
| XAMHUP   | Er(III) | L <sup>2-</sup> | Trimer    | 16        |
| XAMJAX   | Tb(III) | L <sup>2-</sup> | Trimer    |           |
| XIZYUB   | Co(II)  | <i>Enol</i>     | Monom     | 17        |
| XOLCEH   | Zn(II)  | L <sup>2-</sup> | Dimer     | 18        |
| XOLCIL   | Zn(II)  | L <sup>2-</sup> | Dimer     |           |
| XOLCOR   | Zn(II)  | L <sup>2-</sup> | 2D        |           |
| <b>1</b> | Mn(II)  | <i>Keto</i>     | 3D        | This work |

**Table S2.** Coordination bond lengths (Å) and angles (°) in complex **1**.

| Atoms                                | Distance (Å) | Atoms                                | Distance (Å) |
|--------------------------------------|--------------|--------------------------------------|--------------|
| Mn1-O1                               | 2.140(2)     | Mn1-O8                               | 2.126(3)     |
| Mn1-O1 <sup>1</sup>                  | 2.140(2)     | Mn1-O8 <sup>1</sup>                  | 2.126(3)     |
| Mn1-O9 <sup>4</sup>                  | 2.211(3)     | Mn1-O9 <sup>6</sup>                  | 2.211(3)     |
| Mn2-O2                               | 2.137(3)     | Mn2-O4                               | 2.152(2)     |
| Mn2-O7                               | 2.152(2)     | Mn2-O6 <sup>2</sup>                  | 2.224(3)     |
| Mn2-O3 <sup>5</sup>                  | 2.219(3)     | Mn2-O5 <sup>8</sup>                  | 2.144(3)     |
| N1-H1N1                              | 0.98(4)      | N2-H2N2                              | 0.83(4)      |
| N3-H3N3                              | 0.90(4)      |                                      |              |
| Atoms                                | Angle (°)    | Atoms                                | Angle (°)    |
| O1-Mn1-O8                            | 89.42(10)    | O1-Mn1-O1 <sup>1</sup>               | 174.00(10)   |
| O1-Mn1-O8 <sup>1</sup>               | 86.83(10)    | O1-Mn1-O9 <sup>4</sup>               | 82.71(9)     |
| O1-Mn1-O9 <sup>6</sup>               | 101.97(9)    | O1 <sup>1</sup> -Mn1-O8              | 86.83(10)    |
| O8-Mn1-O8 <sup>1</sup>               | 102.35(11)   | O8-Mn1-O9 <sup>4</sup>               | 165.00(10)   |
| O8-Mn1-O9 <sup>6</sup>               | 89.99(10)    | O1 <sup>1</sup> -Mn1-O8 <sup>1</sup> | 89.42(9)     |
| O1 <sup>1</sup> -Mn1-O9 <sup>4</sup> | 101.97(9)    | O1 <sup>1</sup> -Mn1-O9 <sup>6</sup> | 82.71(9)     |
| O8 <sup>1</sup> -Mn1-O9 <sup>4</sup> | 89.99(10)    | O8 <sup>1</sup> -Mn1-O9 <sup>6</sup> | 165.00(10)   |
| O9 <sup>4</sup> -Mn1-O9 <sup>6</sup> | 79.25(10)    | O2-Mn2-O4                            | 82.69(9)     |
| O2-Mn2-O7                            | 96.30(9)     | O2-Mn2-O6 <sup>2</sup>               | 89.57(10)    |
| O2-Mn2-O3 <sup>5</sup>               | 176.70(10)   | O2-Mn2-O5 <sup>8</sup>               | 102.60(10)   |
| O4-Mn2-O7                            | 172.31(9)    | O4-Mn2-O6 <sup>2</sup>               | 81.50(9)     |
| O3 <sup>5</sup> -Mn2-O4              | 95.54(10)    | O4-Mn2-O5 <sup>8</sup>               | 100.26(9)    |
| O6 <sup>2</sup> -Mn2-O7              | 90.87(9)     | O3 <sup>5</sup> -Mn2-O7              | 85.08(9)     |
| O5 <sup>8</sup> -Mn2-O7              | 87.41(9)     | O3 <sup>5</sup> -Mn2-O6 <sup>2</sup> | 87.42(10)    |
| O5 <sup>8</sup> -Mn2-O6 <sup>2</sup> | 167.81(10)   | O3 <sup>5</sup> -Mn2-O5 <sup>8</sup> | 80.42(10)    |

1 = -x, y, 1/2-z; 2 = -x, y, 1/2-z; 3 = x, -y, 1/2+z; 4 = -1/2+x, -1/2+y, z; 5 = 1/2+x, 1/2+y, z; 6 = 1/2-x, -1/2+y, 1/2-z; 7 = 1/2-x, 1/2+y, 1/2-z; 8 = 1/2-x, 1/2-y, 1-z

**Table S3.** Hydrogen bond dimensions for complex **1**.

| D-H...A      | D-H/(Å) | H...A/(Å) | D...A/(Å) | <D-H...A/(°) | symmetry              |
|--------------|---------|-----------|-----------|--------------|-----------------------|
| N3-H3N3...O7 | 0.90(4) | 2.40(5)   | 2.718(4)  | 101(3)       |                       |
| N3-H3N3...O3 | 0.90(4) | 2.00(4)   | 2.894(4)  | 171(4)       | 1/2+x, 1/2+y, z       |
| N2-H2N2...O4 | 0.83(4) | 2.33(5)   | 2.698(4)  | 108(3)       |                       |
| N2-H2N2...O6 | 0.83(4) | 2.02(4)   | 2.830(4)  | 167(4)       | 1-x, -y, 1-z          |
| N1-H1N1...O1 | 0.98(4) | 2.33(5)   | 2.682(4)  | 100(3)       |                       |
| N1-H1N1...O9 | 0.98(4) | 1.90(4)   | 2.868(4)  | 174(4)       | -1/2+x, -1/2+y, z     |
| C5-H5...O4   | 0.95    | 2.35      | 3.040(8)  | 129          | -1/2+x, -1/2+y, z     |
| C16-H16...N2 | 0.95    | 2.56      | 3.306(5)  | 136          | -1/2+x, 1/2-y, -1/2+z |
| C17-H17...O1 | 0.95    | 2.57      | 3.268(4)  | 131          | 1/2-x, 1/2+y, 1/2-z   |

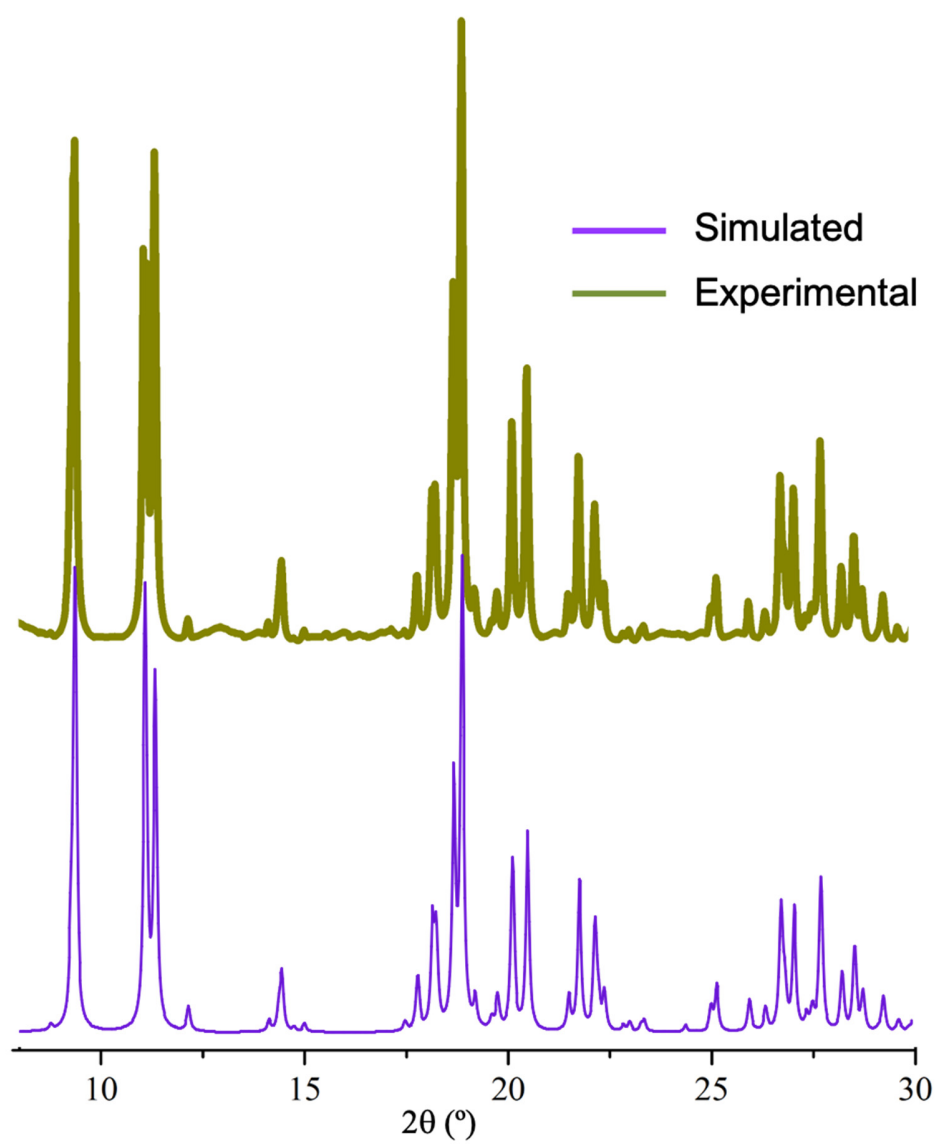

**Figure S1.** Simulated and experimental X-ray powder diffractograms for compound **1**.

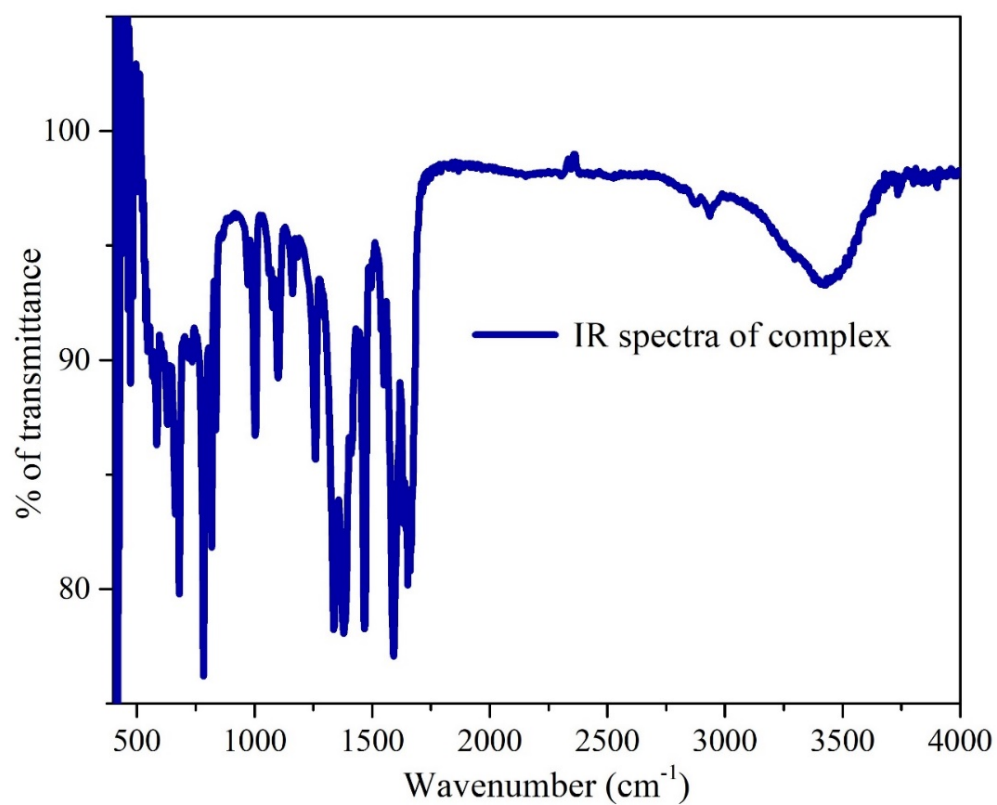

**Figure S2.** IR spectra of compound  $[\text{Mn}(\text{HL})_2]$  (1).

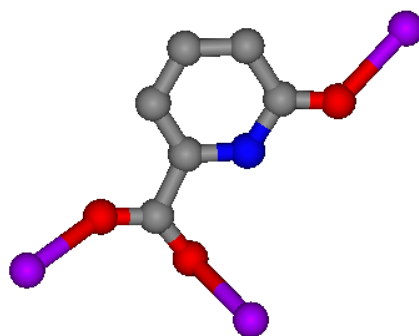

**Figure S3.**  $\mu_3$ -bridging mode of the ligand through carboxylato and hydroxy groups.  
Colour code: C = grey, O = red, N = blue and Mn = purple).

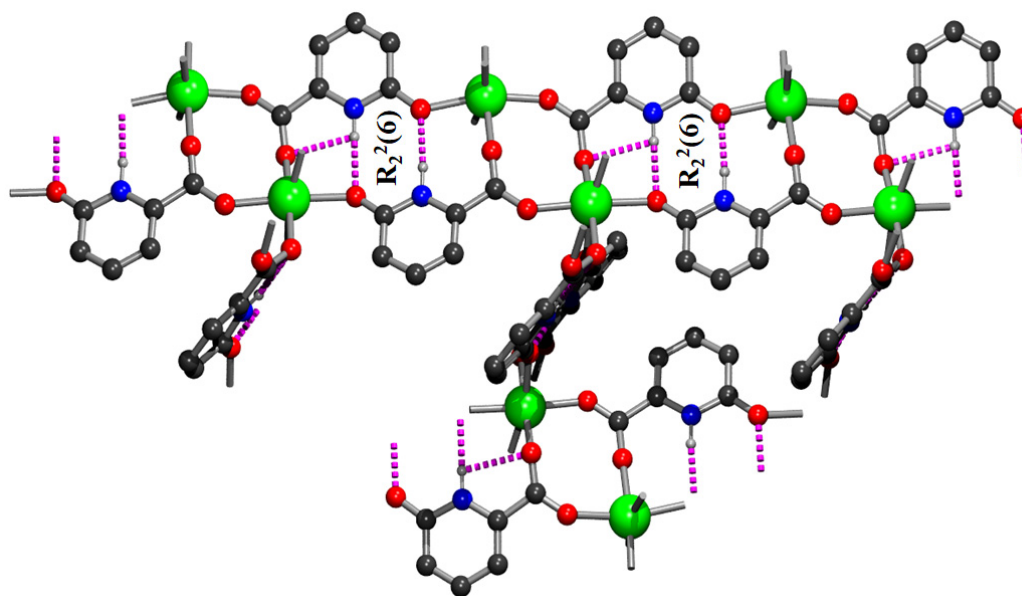

**Figure S4.** Hydrogen bonding interactions present in the complex. Colour code: C = black, O = red, N = blue and Mn = green. Pink lines indicate the H-bonds.

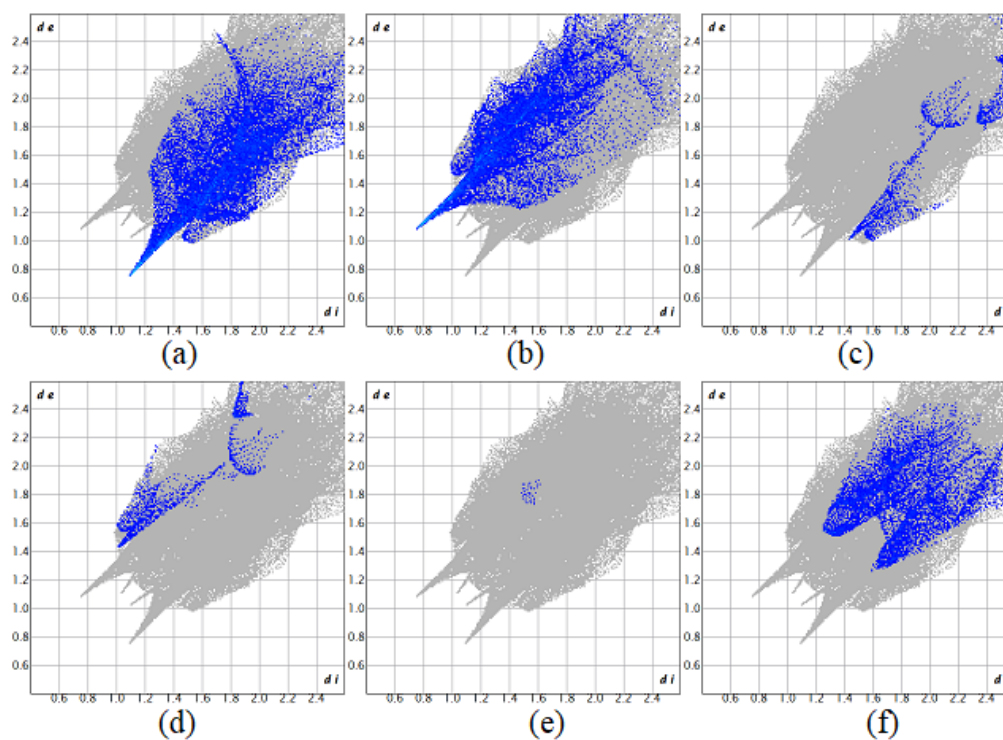

**Figure S5.** 2D fingerprint plots for a)  $O \cdots H$ , b)  $H \cdots O$ , c)  $N \cdots H$ , d)  $H \cdots N$ , e)  $N \cdots O$  and f)  $O \cdots O$  interactions.

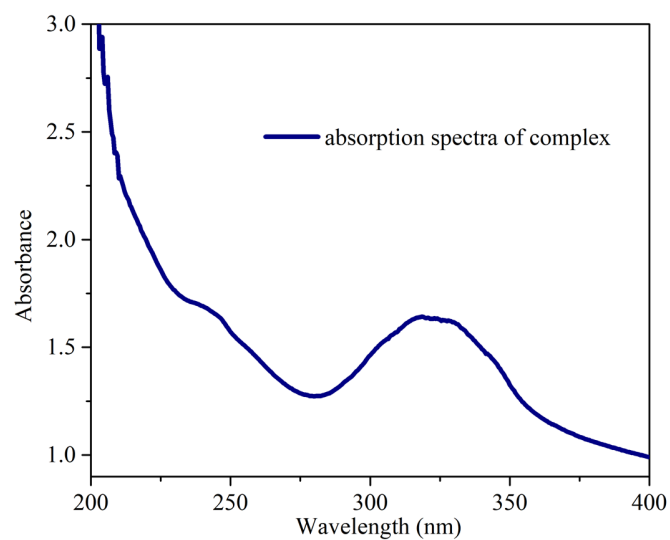

**Figure S6.** Solid-state absorption spectra of compound **1**.

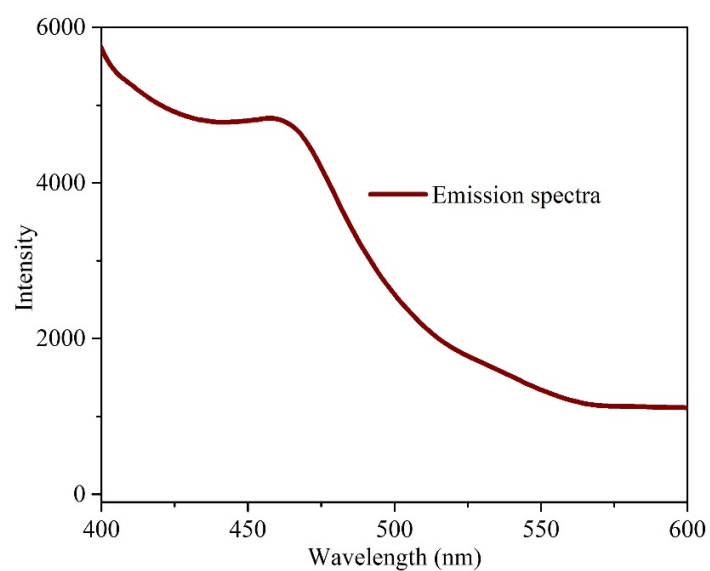

**Figure S7.** Solid-state emission spectra of compound **1**.



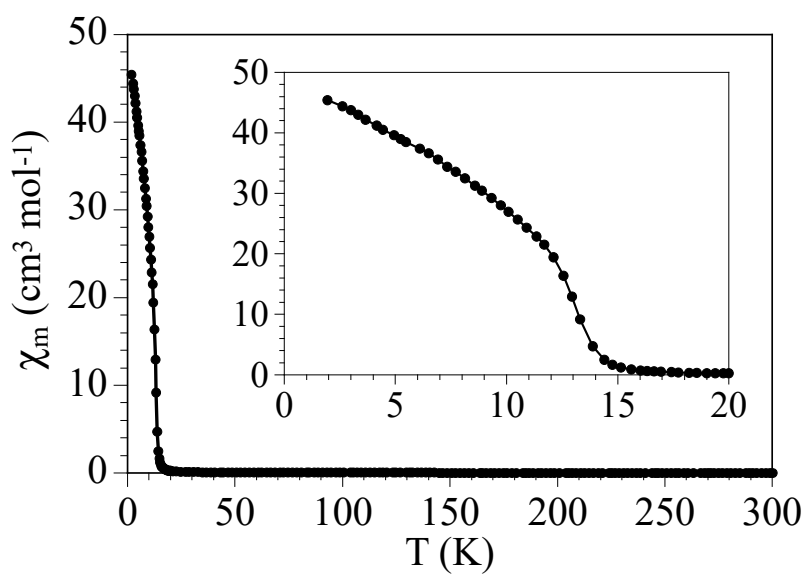

**Figure S8.** Thermal variation of  $\chi_m T$  for compound **1**. Inset shows the low temperature region.

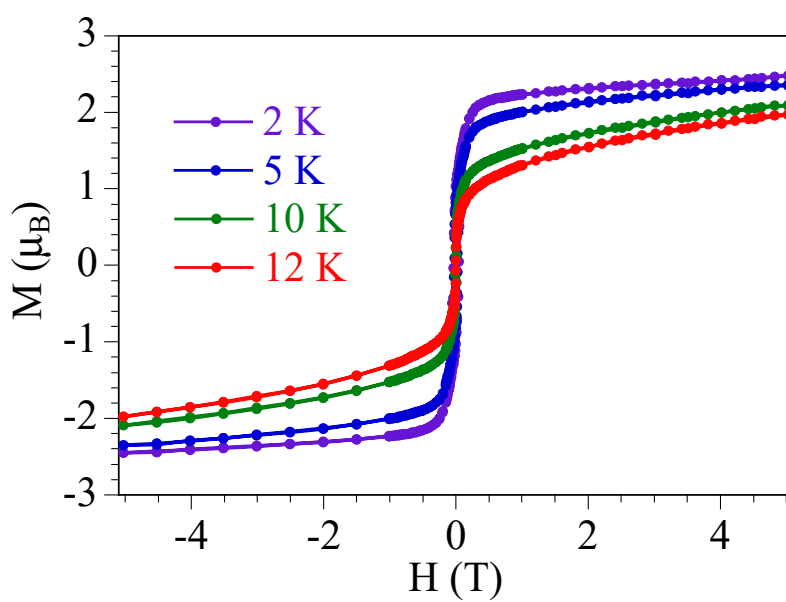

**Figure S9.** Isothermal magnetization at different temperatures for compound **1**.

## References

1- Kang, S. K.; Shim, Y. S. Poly[(m<sup>6</sup>-6-Oxidopyridinium-2-Carboxylato)Caesium]. *Acta Cryst. E* **2011**, 67, m1237.

- 2- Małecki, J. G.; Krompiec, S.; Maroń, A.; Penkala, M. Synthesis, Molecular, Spectroscopic and Catalytic Characterization of Ruthenium(II) Complexes with Pyridine-2-Carboxylic Acid Derivatives Ligands. *Polyhedron* **2012**, *48*, 21-30.
- 3- Kukovec, B.-M., Popovic, Z., & Pavlovic, G. Copper(II) Complexes with 3- and 6-hydroxypicolinic Acid. Preparation, Structural, Spectroscopic and Thermal Study. *Acta Chimica Slovenica*, **2008**, *55*, 779-787
- 4- B.-M. Kukovec, B. M.; Kaksa, M.; Popovic, Z. Synthesis and Characterization of a Copper(II) Complex with 6-Hydroxypicolinic Acid and 3-Picoline *Croatia Chemica Acta*, **2012**, *85*, 479-483
- 5- Bian, G.; Kuroda-Sowa, T.; Konaka, H.; Maekawa, M.; Munakata, M. Bis(m-6-Hydroxy-Picolinato)-m-Oxo-Bis-[Di-Pyridine-Manganese(III)] Monohydrate. *Acta Cryst. E* **2004**, *60*, m338-m340
- 6- Sengül, A.; Büyükgüngör, O. Trans-Di-Aqua-Bis(6-Hydroxy-Picolinato-k<sup>2</sup>-N,O<sup>2</sup>)Copper(II). *Acta Cryst. E* **2005**, *61*, m119-m121.
- 7- You-Zhu Yu, Song-Yang Chang, Xi Han, Guang-Xin Chen, Ya-Wei Xuan, Xian-Li Wu, Fang Wang, Hydrothermal Syntheses, Crystal Structures and Luminescence Properties of Cu(II) and Cd(II) Complexes Assembled by 6-Hydroxypicolinic Acid and 1,10-Phenanthroline *Jiegou Huaxue*, **2019**, *38*, 651-659.
- 8- Sun, C.; Zhou, J.; Li, W.; Jin, L. Supramolecular Structures from Mononuclear, Binuclear and 2D Net of Copper(II) Complexes with 6-Hydroxypicolinic Acid. *Z. anorg. allg. Chem.* **2008**, *634*, 549-554.
- 9- Su, W.; Guo, Y.; Yu, Y.; Wang, Y. Synthesis, Structure and Magnetic Property of a Linear Trinuclear Dy(III) Single Molecular Magnet. *Inorg. Chem. Commun.* **2020**, *120*, 108161.
- 10- Nakasone, T.; Nishioka, T.; Asato, E.; Kinoshita, I.; Takara, S. Synthesis and Structural Characterization of Novel Ruthenium(II) Complexes Bearing Hydroxypicolinato Ligands. *Polyhedron* **2012**, *45*, 152-157.
- 11- Casas, J. S.; Castellano, E. E.; Ellena, J.; García-Tasende, M. S.; Sánchez, A.; Sordo, J.; Toma, M. Dimethylthallium(III) Complexes with Picolinic Acid and its Hydroxyl Derivatives. *Polyhedron* **2008**, *27*, 1296-1302.
- 12- Kukovec, B.; Vaz, P. D.; Calhorda, M. J.; Popović, Z. Disappearing and Concomitant Polymorphism of Nickel(II) Complexes with 6-Hydroxypicolinic Acid. Structural and Density Functional Theory Studies. *Cryst. Growth Des.* **2010**, *10*, 3685-3693.

- 13- Chattopadhyay, S.; Fanwick, P. E.; Walton, R. A. Reactions of the Triply-Bonded Complex  $cis\text{-Re}_2(\mu\text{-O}_2\text{CCH}_3)_2\text{Cl}_2(\mu\text{-Dppm})_2$  with Pyridine Carboxylic Acids. the Isolation and Structural Characterization of a Third Structural Isomer of  $\text{Re}_2(\text{Dipic})\text{Cl}_2(\mu\text{-Dppm})_2$  (Dipic = Pyridine-2,6-Dicarboxylate). *Dalton Trans.* **2003**, 3617-3621.
- 14- Mukiza, J.; Hosten, E. C.; Gerber, T. I. A. Rhenium(III), (IV) and (V) Complexes with 6-Hydroxypicolinic Acid. *Polyhedron* **2016**, 110, 106-113.
- 15- Nakama, Y.; Nishioka, T.; Nakasone, T.; Asato, E.; Kinoshita, I.; Takara, S. Synthesis And Crystal Structure of  $[\text{RuCl}(\text{6-hydroxypicolinato})(2,2';6',2''\text{-terpyridine})]\cdot(\text{N,N-dimethylformamide})$ . *X-ray Structure Analysis Online* **2010**, 26, 33-34.
- 16- Sun, C.; Jin, L. Supramolecular Architectures from the Self-Assembly of Lanthanide Ions with 6-Hydroxypicolinic Acid and 1,10-Phenanthroline. *J. Mol. Struct.* **2005**, 741, 241-247
- 17- Kukovec, B.; Popović, Z.; Pavlović, G.; Rajić Linarić, M. Synthesis and Structure of Cobalt(II) Complexes with Hydroxyl Derivatives of Pyridinecarboxylic Acids: Conformation Analysis of Ligands in the Solid State. *J. Mol. Struct.* **2008**, 882, 47-55.
- 18- Sun, C.; Zheng, X.; Li, W.; Wang, M.; Fang, C. Assembly of Supramolecular Networks with the Inclusion of Water Chains, Cyclic Hepta and Octa Water Clusters. *Z. anorg. allg. Chem.* **2008**, 634, 2663-2669.
